# Supplementary material for: An exploration of collaborative scientific production at MIT through spatial organization and institutional affiliation
Source: PubMed Central journal article supplement (PMC5480888; doi:10.1371/journal.pone.0179334), 2017-06-22
Supplement: pone.0179334.s001.pdf [file pone.0179334.s001.pdf]

1 **Supporting Information**

2  
3 **An Exploration of Collaborative Scientific Production at MIT Through**  
4 **Spatial Organization and Institutional Affiliation**

5 **Authors:**

6 Matthew Claudel<sup>1,2</sup>¶\*, Emanuele Massaro<sup>2</sup>¶\*, Paolo Santi<sup>2,3</sup>, Fiona Murray<sup>4</sup> and Carlo Ratti<sup>2</sup>

7 **Affiliations:**

8 <sup>1</sup>Lab for Innovation Science & Policy, Massachusetts Institute of Technology, Cambridge, MA  
9 02139

10 <sup>2</sup>Senseable City Laboratory, Massachusetts Institute of Technology, Cambridge, MA 02139

11 <sup>3</sup>Istituto di Informatica e Telematica del Consiglio Nazionale delle Ricerche, 56124 Pisa, Italy.

12 <sup>4</sup>MIT Sloan School of Management, Cambridge, MA 02142

13  
14 \*Correspondence to: [claudel@mit.edu](mailto:claudel@mit.edu), [emassaro@mit.edu](mailto:emassaro@mit.edu)

15 ¶These authors contributed equally to this work.  
16  
17  
18  
19

## 20 **Supplementary Information**

### 21 **Section A – Extensive Literature Review**

#### 22 **Scales of Collaborative Activity, from the Desk to the Globe**

##### 23 A. Microgeographies: The Desk

24 The configuration of personal workspaces – at the scale of a desk in a room – certainly define social  
25 interactions. Those configurations may also define the types of ideas that are collaboratively generated,  
26 through increasing exploration during low opportunity-cost time, and enabling accelerated iteration during  
27 early or uncertain phases of collaboration [1,2]. Yet in the case of workplace microgeography, it is often  
28 difficult to identify cause and effect: whether researchers work nearby because they collaborate, or if they  
29 collaborate because they work nearby. To address concerns of endogeneity in microgeographic  
30 organization, studies have been designed to exploit a random exogenous factor – for example, the  
31 unexpected spatial reconfiguration of researchers. Over the course of a move to new premises, Peponis  
32 [3] conducts survey-based social and spatial network analysis, finding that layout can contribute to  
33 frequency and volume of communication. A similar analytical design by Catalini (focusing on  
34 reconfigurations during building closure for asbestos screening), demonstrates that, beyond simply  
35 provoking communication, shifts in proximity lead to increased experimentation and eventually to  
36 stronger ‘breakthrough ideas’ [1].

##### 37 B. Hubs: The Building

38 The majority of the literature reviewed previously – that addressing lab configurations, office proximity,  
39 space syntax, collaboration and re-configuration – falls within the architectural scale.

##### 40 C. Ecosystems: The District

41 Although it has no discrete boundary or categorical definition, the ‘district’ is perhaps the most relevant  
42 scale for innovation processes with respect to commercialization. There is a rich literature from urban  
43 planning, management, organization science and economics, as well as an emerging field of innovation  
44 science, that considers this so-called ‘ecosystem’ or ‘cluster’ – an area smaller than a city, and more  
45 heterogeneous than a campus. Topical literatures have emerged around specific terms and definitions, but  
46 all address this district scale. These include ‘Marshallian industrial districts,’ ‘innovative milieus,’ ‘new  
47 industrial spaces,’ ‘innovation networks,’ ‘regional network evolution,’ and most recently, the  
48 ‘ecosystem-approach’ [4,5]. Each has a unique classification – for example the ‘cluster’ definition is a  
49 geographic concentration of interconnected companies and associated institutions in a particular field,  
50 linked by commonalities and complementarities [4,6,7].

51 This work – and the management science literature in general – primarily addresses market-related  
52 characteristics and effects of proximity. Porter’s seminal work on entrepreneurial clusters, for example,  
53 describes inter-firm relationships, and evaluates such phenomena as the competitive transfer of financial  
54 and human capital. In contrast, the present analysis focuses on interrelations, knowledge-creation and  
55 technology transfer outside of (or prior to) commercialization, but nonetheless accesses the literature  
56 describing general effects of geographical and institutional proximities (campus space and departments,  
57 respectively).

58 The innovation ecosystem, as defined in the MIT Stakeholder Model is a vibrant, co-located  
59 agglomeration of high-growth potential firms and related stakeholders, an interconnected set of people,  
60 resources and the physical environment that provides the context for innovation-driven enterprises to start,  
61 grow and scale. The model describes place-based interrelations of five key stakeholders: entrepreneurs;  
62 universities or research institutes; government; corporations; and risk capital.

##### 63 D. Agglomerations: The City

64 Understanding collaboration and innovation at the urban scale (and the inter-urban, national and global  
65 scales) demands fundamentally different tools and procedures. It is at the metropolitan level that data  
66 becomes big data, beyond this threshold it can only be approached through a specialized set of statistical,

67 social, mathematical and computational analysis techniques – from the collection, management and  
68 processing of data, to the application of statistical models, to means for addressing concerns of subject  
69 privacy, and even to visual representation and dissemination.

70 Intuitively, metropolitan-scale conclusions can be drawn using this approach. Stern and Guzman, for  
71 example, interact a number of publicly available data points related to new firms (including name,  
72 keywords, intellectual property, legal status, etc.) and construct an ex-ante model of entrepreneurial  
73 quality: the statistical likelihood of success outcomes, defined as acquisition or IPO. The resulting  
74 Regional Entrepreneurship Cohort Potential Index (RECPI) can be trained on metropolitan regions to  
75 estimate the impact of a city itself on its firms: the Regional Entrepreneurship Acceleration Index (REAI)  
76 measures the performance over time as the ratio between the statistical success potential of a cohort of  
77 firms and their observed success rate in that city. This tool has been used to evaluate and compare cities  
78 across the United States, finding characteristic patterns of entrepreneurship [8].

79 Even more generally, certain urban effects related to collaboration and knowledge output are quantifiable  
80 through a big data analysis approach. For example, a number of metropolitan phenomena – including  
81 patent filings, for example – scale superlinearly with city size [9]. An empirical model proposed by  
82 researchers at the Santa Fe Institute is consistent across cities, time periods and nations. Derivative growth  
83 equations evidence a number of urban taxonomies, for example, the distinction between urban growth  
84 fueled by entrepreneurial innovation versus growth through economies of scale, as measured by wealth  
85 and patents [10]. Trends in collaborative invention are significantly spatialized as well. Large metropolitan  
86 areas tend to have a higher number of patents and larger team sizes: an average of greater than three co-  
87 inventors. The most highly productive metropolitan areas have over four inventors per patent [11]. In the  
88 case of inter-urban and global collaborations, a characteristic distance – unique to specific fields – can be  
89 quantified [12].

90 These, and a number of related studies, access scientometric observables (for example, collaboration,  
91 publication density, co-inventor distance, and others) and apply macro-level tools of urban science,  
92 delivering valuable insights at a low level of spatial granularity. For the purposes of the present research,  
93 city-scale dynamics are important for contextualization, but specific results are not easily transferrable to  
94 the campus or building scale.

### 95 **Observing Scholarship: Faculty, Papers and Patents**

96 Proximity-enabled communication – whether in the lab, the building, the campus, the institution, or the  
97 cluster – is a crucial enabler of scientific knowledge creation. Place is at the core of the university model  
98 throughout history. Yet for intellectual material to be recognized, validated, and built upon or  
99 commercialized, it must be codified and disseminated to the global scientific community, specifically, as  
00 papers and patents: observable knowledge objects. Although these documents are not comprehensively  
01 representative of intellectual activity at a given institution (and their role varies dramatically across  
02 disciplines), they nonetheless offer a systematic proxy for scholarly output. Bibliometric data enables  
03 empirical analysis of impact, affiliation, collaboration, and citation over time.

04 For the purposes of this study, we consider papers published in peer-reviewed journals, and patents filed  
05 through the MIT Technology Licensing Office, but a portrait of scholarly activity at MIT should be  
06 contextualized by broader trends in scientific production. In the case of paper publishing by the global  
07 scientific community, individual productivity (on both single-author and collaborative observations) has  
08 a fat-tailed distribution: a small number of scientists produce a very large number of papers, and this has  
09 been consistent over time (from Lotka’s Law of Scientific Productivity, proposed in 1926, to Newman’s  
10 network analysis in 2001 [13]). Synthesizing several estimations of bibliometric data, Borner proposed a  
11 general model for the growth of scientific publishing as well as co-authorship and citation trends,  
12 successfully validated against twenty years of publication data from the Proceedings of the National  
13 Academy of Sciences [14]. The global rate of increase in scholarly publication (estimated as the number  
14 of cited papers that are subsequently cited) is approximately 8% [15].  
15

16 The World Intellectual Property Organization (WIPO) estimates a similar growth for intellectual property.  
17 Excepting a downturn during the global economic crisis in the years 2008 and 2009, the rate of increase  
18 in patenting is now approximately 9.2%. College, university, and institute patents represent between 4.2  
19 – 4.7% of U.S. nongovernmental patents, of which Massachusetts Institute of Technology holds an annual  
20 average of 4.2% (of all U.S. patents granted to U.S. academic institutions).

21

## 22 **The Porous Walls of the Institution: Managing Technology Transfer**

23 A categorization of research is particularly relevant with respect to incentives and procedures for  
24 publication, implementation and commercialization. Technology transfer is an important economic driver,  
25 and foregrounds the role of intellectual property rights policies [16]. The pathway from research to  
26 commercialization was fundamentally redefined in 1980 with the Bayh-Dole Act (or Patent and  
27 Trademark Amendments Act) that is in place today. The act systematized and unified patent policy across  
28 federal agencies, and allowed for universities and research institutes to hold patents that result from  
29 government funded research. This legal measure shifted incentives for researchers of all levels to patent  
30 and license through the institution, and for the organization itself to engage in joint research ventures  
31 or enable spinoff startup companies. An increase in the commercialization rate of university-based  
32 technology following 1980 can be attributed in some part to the Bayh-Dole Act.

33 A more explicit approach to technology licensing has given rise to the ‘economics of intellectual property’  
34 at universities and research institutions [17]. Many institutions now have technology transfer offices that  
35 serve to manage the exit dynamics of scientific research. Although terms are unique to each organization,  
36 in most cases there are clear motivations for faculty to disclose and file patents through the institution, at  
37 various stages of technical resolution, from proof of concept to product [18].

38 At MIT, the Technology Licensing Office (TLO) assists the passage of research from the lab to the market,  
39 through patenting and licensing. The TLO interfaces with large corporations, SMEs and startups –  
40 brokering the legal use of patented MIT research – and generally assists students, faculty and staff with  
41 their pursuit of innovation-driven work. The TLO files patents with USPTO, and has worked with an  
42 average of 20-27 new firms per year from 2000 to 2014.

43

## 44 **Time Delays in Academic Output**

45 There is a significant time delay in the course academic production from idea to publication. The  
46 sequences for papers and patents are categorically different, resulting in a significant discrepancy between  
47 overall time delay (a discrepancy generative of certain experimental structures, e.g. Murray and Stern,  
48 2007 [19]). Although there is variation across fields, papers are accepted, on average, 6.4 months after  
49 submission, and are published 5.8 months after acceptance – the total average time delay is 12.2 months  
50 from submission to publication in a journal. The patenting process is substantively different, and tends to  
51 vary widely between different contexts. In the case of MIT, an individual approaches the TLO with a  
52 patent application, and works with the office to revise the document. A formal application is filed by TLO  
53 at the US Patent and Trademark Office between 0 and 5 months later, depending on revisions. There is  
54 then a period of 24-36 months before review by a patent examiner, followed by a granting decision period  
55 of 12-24 months. The total time elapse from submission to granting is an average of 2.5-5 years.

56

## 57 **Section B - Data Analysis**

### 58 **Original Data: Directory**

59 Directory information is from the MIT Directory (accessed in the MIT Data Warehouse, via the Office of  
60 Institutional Research). The full dataset includes all MIT affiliates, including students, researchers,  
61 fellows, tenure track and non-tenure track faculty, etc. The MIT directory contains location-attributes for  
62 offices (building, floor and room), as well as affiliation attributes (school, department, or lab), but the  
63 information is not recorded for every person (see B2). The MIT Data Warehouse commits a regular  
64 ‘freeze’ of the data, such that time-dependent information is captured (e.g. changes in affiliation or title).

65  
66  
67  
68  
69  
70  
71  
72  
73  
74  
75  
76  
77  
78  
79  
80  
81  
82  
83  
84  
85  
86  
87  
88  
89  
90  
91  
92  
93  
94  
95  
96  
97  
98  
99  
00  
01  
02  
03  
04  
05  
06  
07  
08  
09  
10  
11  
12

### **Original Data: Publication**

Publication information is from a comprehensive list aggregated by Academic Analytics, a non-institutionally affiliated data analytics company. Academic Analytics aggregates publication data from scholarly journals, for the purposes of evaluation, strategic decision-making, and benchmarking in universities. Publications in the Academic Analytics database have been consistently filtered with a proprietary algorithm to match individual authors, and the company’s total database includes over 270,000 individuals from over 10,000 departments in 385 universities.

MIT-specific data has been acquired by the Office of Institutional Research (OIR) and is stored in the MIT Data Warehouse. The dataset includes papers published by MIT-affiliated individuals in peer-reviewed journals with DOI number identifiers, as well as date, and authorship. Data is stored such that a paper is associated with an MIT ID, and the same paper is repeated if there are more than one MIT authors on the paper. There are 65,536 MIT authorship instances (with repeated DOIs) and 52,511 papers (with unique DOIs) spanning the years 1959 to 2015. In this dataset, there are 1,440 total MIT authors (faculty and non-faculty).

### **Original Data: Patent**

Patent information is from the database of patent applications filed through the MIT Technology Licensing Office (TLO) and aggregated in the MIT Data Warehouse (via the OIR). The dataset includes a unique identifier (Patent Serial Number) for each patent, as well as date of filing, MIT ID of primary inventor, and total authorship (all inventors listed on the patent). There are 7,344 patents, and 5,487 MIT inventors (faculty and non-faculty) over the years 1938 to 2015.

### **Pre-Processing Data**

Through pre-processing the total databases, several necessary limitations and filters have been introduced to increase accuracy of the data under consideration. These filters are: B1. Time Frame (2004 – 2014); B2. Affiliation (Tenure and Tenure-track Faculty) to arrive at a final dataset, C.

#### **Pre-Processing: Time Frame**

The temporal limitation has two reasons. First, there was a sharp increase in the number of recorded papers in the year 2003, which may have resulted from Academic Analytics’ migration to a digital database for content management. Although there are a small number of papers recorded as early as 1959, trends and attributes are not consistent before and after the shift. Secondly, the practice of regular data ‘freezes’ committed by OIR / MIT Data Warehouse began in 2004. In the interest of understanding changes over time (e.g. hiring or departing, affiliation, promotion, office location) rather than working under the assumption that a faculty member’s current status is true of past years, we consider only this range, limiting the data to the time frame 2004-2014.

#### **Pre-Processing: Affiliation**

There are numerous modes of affiliation to MIT, many of them involved with the processes of research and the production of academic output. For example, an undergraduate student may participate in groundbreaking research and be listed as an author on a paper with her Principal Investigator. A comprehensive portrait of scholarly activity at MIT would capture these myriad interactions. However, several attributes are consistent only for a subset of the MIT community – the result both of structural factors and data management. The former is intuitive: in the case of the UROP, she would not have a designated office location or even a departmental affiliation. The same is true, to varying levels of consistency, up to the level of post-doctoral fellows, lecturers, or professors of the practice. Furthermore, the data ‘freeze’ only captures attributes for certain levels of affiliation. The subset with full consistency

13 is tenure and tenure track faculty, who are necessarily affiliated to a department and located in an office.  
14 As such, the most accurate and consistent directory includes only faculty who are tenure or tenure track.

## 16 **Data Summary**

17 The dataset under consideration for the remainder of the study is characterized in Table 1.

## 19 **Spatial Data**

20 Spatial data describing the MIT campus is joined from several different sources. Building shapefiles (in  
21 GIS format) are from the Department of MIT Facilities and overlaid on publicly available map tiles (from  
22 OpenStreetMaps via CartoDB). Building-level data (area, facility use codes, office numbers and floors)  
23 are from the MIT Data Warehouse. The databases are linked using building code (e.g. Building E70;  
24 Building 9).

## 25 **Section C - Simpson Diversity Index**

26 For a given number of types, the value of a co-affiliation index (  $C$  ) is maximized when all types are  
27 equally abundant. In this case, the number of species  $i = 1, 2, \dots, d$  are defined by the total number of  
28 unique departments or buildings, and the number of different unique collaborators  $n_i$  who belong to a  
29 given type  $i$ . If an observation is characterized by  $N$  authors and  $d$  types, the diversity index is given by:

$$31 \quad C = \frac{1}{N(N-1)} \sum_{i=1}^d n_i(n_i-1) \quad (\text{Eq. S1})$$

32  
33 Where the co-affiliation value (  $C$  ) of a single observation is a function of total number of contributors (  $N$  ),  
34 from a total number of departments (  $d$  ), and (  $n_i$  ) number of contributors from each of those  
35 departments (  $i$  ). Values are on a scale from 0 to 1, representing least to greatest co-affiliation or co-  
36 location among collaborators.

## 37 **Section D - Shannon Entropy of Information**

38 The measure was originally proposed to quantify entropy in strings of text: the greater the difference in  
39 letters, and the more equal their proportional abundances in the string of interest, the more difficult it is to  
40 correctly predict which letter will be the next one in the string. The Shannon equation is applicable more  
41 broadly to quantify balance of information content, accounting for variety and quantity. In the case of MIT  
42 campus, we apply the following function to characterize buildings. Given a building  $k$  its heterogeneity  
43 index  $\lambda_k$  is then defined as:

$$44 \quad \lambda_k = - \sum_{i=1}^{D_k} p_i \ln p_i \quad (\text{Eq. S2})$$

45  
46 Where  $D_k$  = number of different departments in building  $k$ , and  $p_i$  is the fraction of people who belong to  
47 the department  $i$ . It is defined as:

$$49 \quad p_i = \frac{N_{ik}}{N_k} \quad (\text{Eq. S3})$$

50  
51 Where  $N_{ik}$  is the number of people that belong to department  $i$  in the building  $k$ , while  $N_k$  are the total  
52 number of people working in building  $k$ .

53

## 54 Section E – Tables

55

| Department                                | Patent to Paper Ratio | Number of Faculty Authors | Total Papers / Person | Total Papers | Average Annual Increase | Intra-MIT Collab. | Number of Faculty Inventors | Total Patents / Person | Total Patents | Average Annual Increase | Intra-MIT Collab. |
|-------------------------------------------|-----------------------|---------------------------|-----------------------|--------------|-------------------------|-------------------|-----------------------------|------------------------|---------------|-------------------------|-------------------|
| Biology                                   | 0.036                 | 60                        | 59.28                 | 3557         | 14.52                   | 20.4%             | 33                          | 3.79                   | 125           | 0.34                    | 21.6%             |
| Chemical Engineering                      | 0.132                 | 35                        | 80.17                 | 2806         | 14.47                   | 25.3%             | 26                          | 14.96                  | 389           | 5.03                    | 34.2%             |
| Chemistry                                 | 0.096                 | 34                        | 79.12                 | 2690         | 2.87                    | 15.3%             | 22                          | 11.68                  | 257           | 1.7                     | 30.0%             |
| Electrical Engineering & Computer Science | 0.069                 | 135                       | 58.47                 | 7893         | 13.95                   | 25.2%             | 90                          | 6.2                    | 558           | 6.25                    | 30.1%             |
| Materials Science and Engineering         | 0.117                 | 35                        | 73.00                 | 2555         | 7.76                    | 25.1%             | 28                          | 10.57                  | 296           | 1.03                    | 30.7%             |
| Mechanical Engineering                    | 0.098                 | 79                        | 48.06                 | 3797         | 26.51                   | 17.8%             | 54                          | 7.26                   | 392           | 5.09                    | 18.9%             |
| Physics                                   | 0.019                 | 82                        | 54.52                 | 4471         | 3.85                    | 29.8%             | 6                           | 14.5                   | 87            | 0.25                    | 78.2%             |
| Program in Media Arts & Sciences          | 0.135                 | 22                        | 47.41                 | 1043         | 7.72                    | 12.7%             | 17                          | 8.88                   | 151           | 2.2                     | 5.3%              |

56

57 **Table A.** Patent and paper output by department, for the top six departments in each category. *Patent to*  
58 *Paper Ratio* represents the total number of patents from a department divided by the total number of  
59 papers, such that 0 represents a department without patents and 1 a department without papers. *Intra-MIT*  
60 *Collaboration* is calculated as an average of the number of documents with another MIT faculty member  
61 vs. the total number of documents, such that values closer to zero represent a lower rate of intra-MIT  
62 collaboration. *Number of Faculty* enumerates the total number of publishing faculty from a given  
63 department, during the time frame. *Average Annual Increase* represents the slope of the trend line in output  
64 per year, a measure of the average increase in output year-to-year, by department

55

56

| Building | Papers per Building | Intra-MIT Collaboration | Papers per Person | Patents per Building | Intra-MIT Collaboration | Patents per Person |
|----------|---------------------|-------------------------|-------------------|----------------------|-------------------------|--------------------|
| 32       | 4166                | 27.8%                   | 110.0             | 140                  | 30.7%                   | 3.68               |
| 3        | 2570                | 19.3%                   | 93.0              | 290                  | 21.4%                   | 8.29               |
| 13       | 2370                | 27.5%                   | 78.9              | 278                  | 45.7%                   | 12.64              |
| 36       | 1949                | 19.6%                   | 78.4              | 171                  | 19.3%                   | 7.77               |
| 6        | 1704                | 20.5%                   | 77.4              | 157                  | 42.0%                   | 13.08              |
| 66       | 1662                | 28.8%                   | 71.8              | 169                  | 46.2%                   | 8.45               |
| 46       | 1607                | 13.6%                   | 67.2              | 69                   | 7.2%                    | 3.63               |
| 54       | 1372                | 12.2%                   | 60.5              | 1                    | 100%                    | 1                  |
| 68       | 1330                | 24.1%                   | 59.4              | 22                   | 9.1%                    | 2.44               |
| 33       | 1285                | 16.8%                   | 59.2              | 40                   | 25.0%                   | 4.44               |

67

68 **Table B.** Patent and paper output per building, for the top ten buildings, during the entire time frame.  
69 *Output per Person* represents the average individual output aggregated to the building level. *Intra-MIT*  
70 *Collaboration* is calculated as the number of documents with another MIT faculty member versus the total  
71 number of documents (aggregated to the building level), such that values closer to zero represent a lower  
72 rate of intra-MIT collaboration.

73

| Building | Depts. | Shannon Entropy | Average ft. <sup>2</sup> | Papers        |                   |        | Patents       |                    |         |
|----------|--------|-----------------|--------------------------|---------------|-------------------|--------|---------------|--------------------|---------|
|          |        |                 |                          | % MIT Collab. | Papers Per Person | Papers | % MIT Collab. | Patents Per Person | Patents |
| 3        | 9      | 1.56            | 340.50                   | 19.3          | 47.59             | 2570   | 21.4          | 8.29               | 290     |
| E40      | 8      | 2.06            | 256.80                   | 17.4          | 13.08             | 340    | -             | -                  | -       |
| 32       | 8      | 1.71            | 398.53                   | 27.8          | 39.68             | 4166   | 30.7          | 3.68               | 140     |
| 16       | 8      | 1.44            | 175.80                   | 26.6          | 31.92             | 830    | 23.9          | 6.77               | 88      |
| E25      | 7      | 1.64            | 479.15                   | 16.8          | 36.33             | 981    | 17.5          | 10.36              | 114     |
| 7        | 6      | 2.45            | 350.54                   | 12.5          | 4.80              | 48     | -             | -                  | -       |
| 1        | 6      | 1.28            | 344.08                   | 12.3          | 29.85             | 1015   | 35.7          | 1.56               | 14      |
| 76       | 6      | 0.89            | 358.75                   | 31.7          | 28.52             | 713    | 27.2          | 7.52               | 158     |
| E38      | 5      | 2.28            | 354.48                   | 21.1          | 6.33              | 57     | 100           | 1.00               | 1       |
| 10       | 5      | 1.99            | 145.95                   | 19.9          | 18.17             | 527    | 44.6          | 6.22               | 56      |

75

76 **Table C.** MIT campus building attributes. Although there are no global correlations between  
77 heterogeneity and the observed indicators of academic output, there are nonetheless specific correlations  
78 between number of departments and output (notably, Buildings 3 and 32). Shown here are the ten buildings  
79 with the highest number of departments. *% MIT Collaboration* represents the percentage of observations  
80 that are with an MIT faculty collaborator versus the total number from that building.

81

82

83

84

| Diversity  | Papers | Patents |
|------------|--------|---------|
| Building   | 0.40   | 0.51    |
| Department | 0.29   | 0.70    |

85

86 **Table D.** Community diversity is a measure of the number of different buildings or departments  
87 represented in each group, normalized by community size.

88

89

90



91 Section F – Figures

92  
93  
94  
95  
96  
97  
98  
99  
00  
01  
02  
03  
04  
05  
06  
07  
08  
09  
10  
11  
12  
13  
14  
15  
16  
17  
18

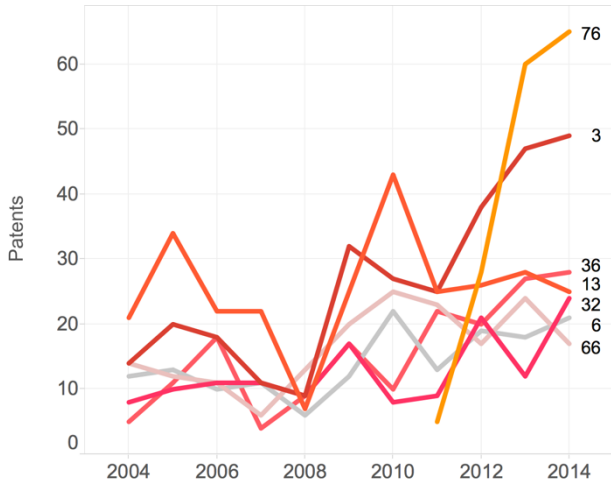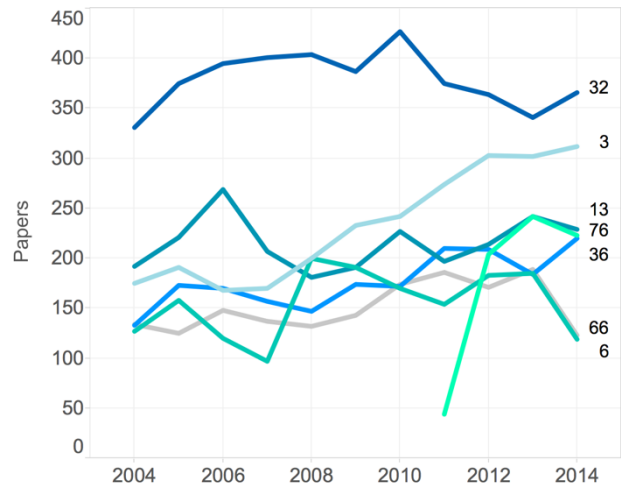

**Figure A. Patent and paper output per building per year, from 2004 to 2014.** This represents output from faculty during the year they were sited in a particular building – accounting for spatial relocations. Building 76, the Koch Institute, was opened in 2010 and by 2013 had become the top patenting building.

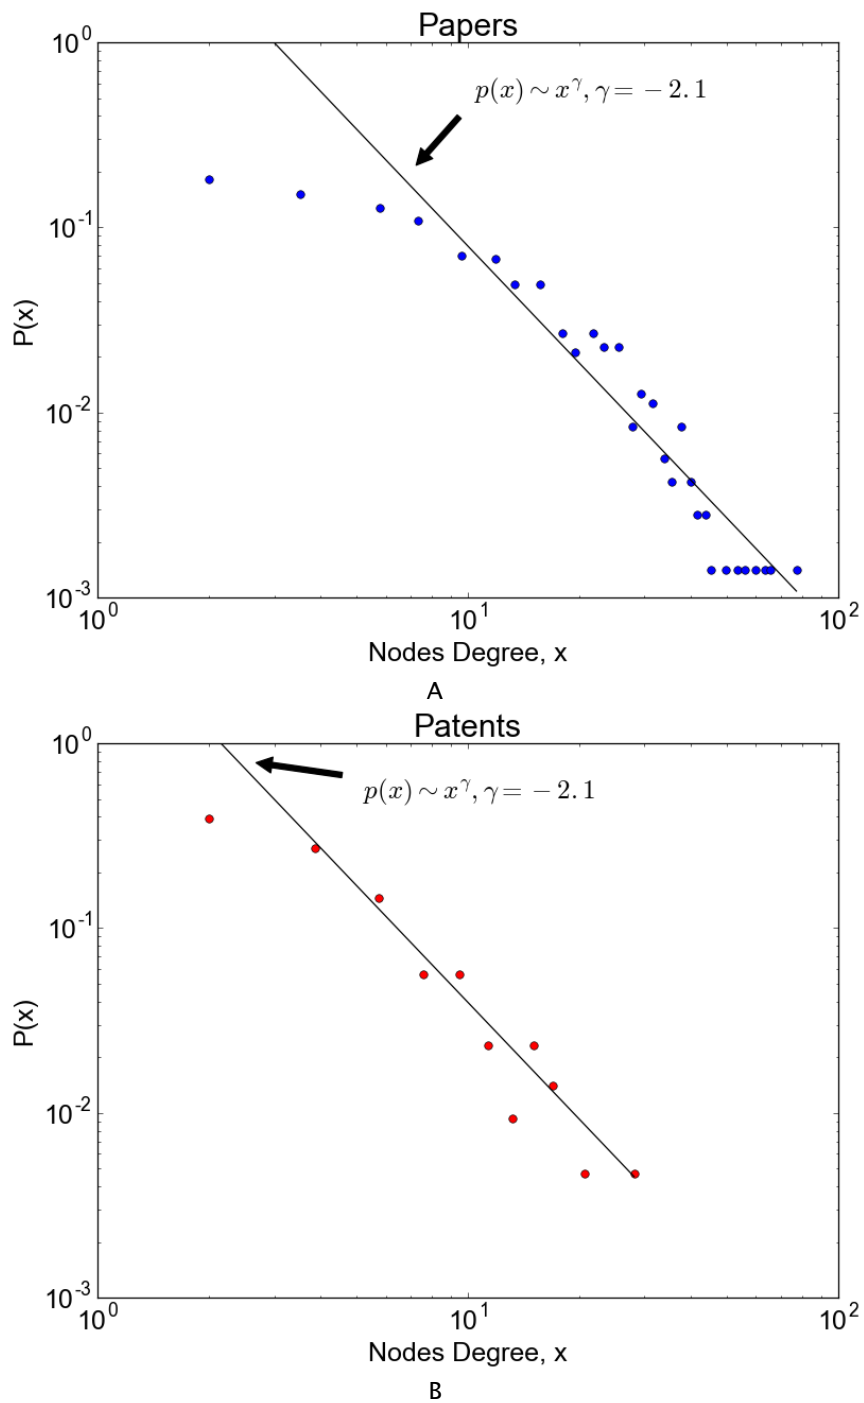

**Figure B. Nodes degree distributions for A) Paper s and B) Patents networks.**

19  
20  
21  
22  
23  
24  
25  
26  
27  
28  
29  
30

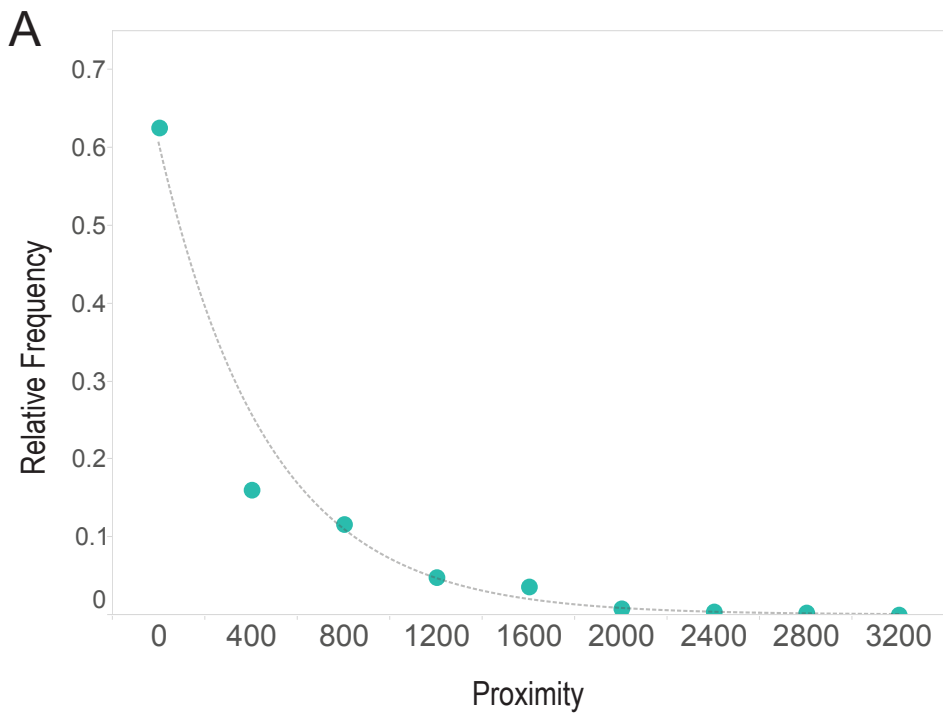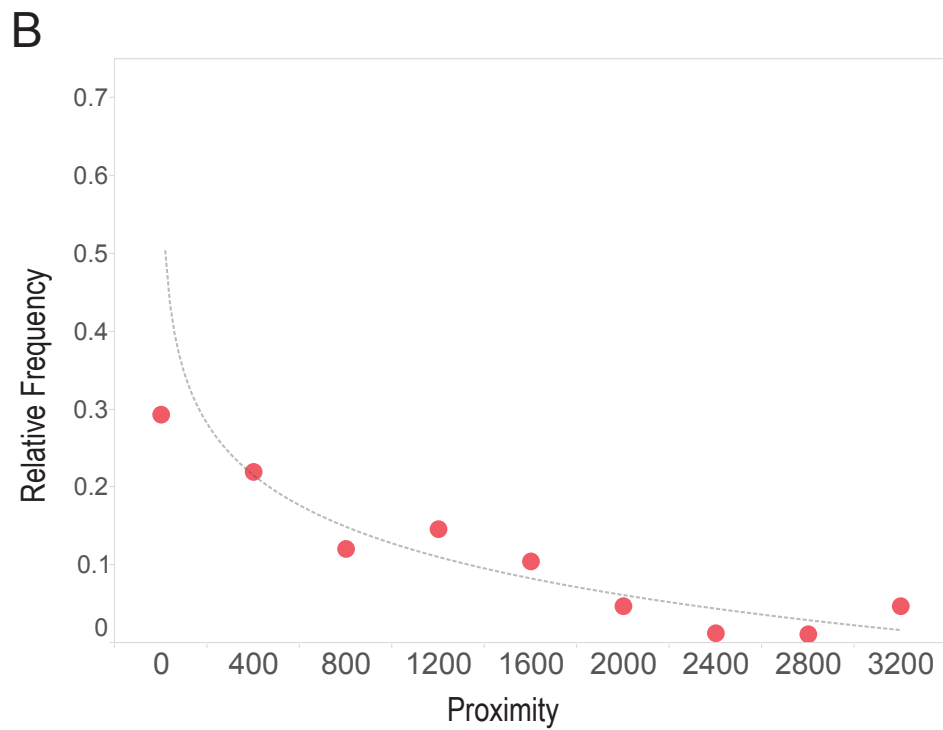

**Figure C. The relative frequency of collaborations between MIT faculty from different departments, plotted against their spatial distance on campus. A) Papers and B) Patents. As distance between two faculty members increases, the likelihood of their collaboration decreases according to a negative exponential function. The same pattern holds true for patents and papers.**

31  
32  
33  
34  
35  
36  
37  
38

A  
Communities in the  
Co-Authorship Network

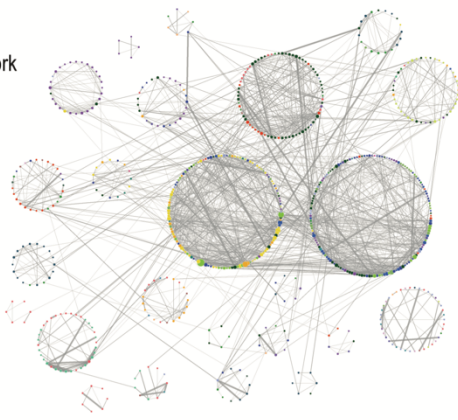

B  
Communities in the  
Co-Inventor Network

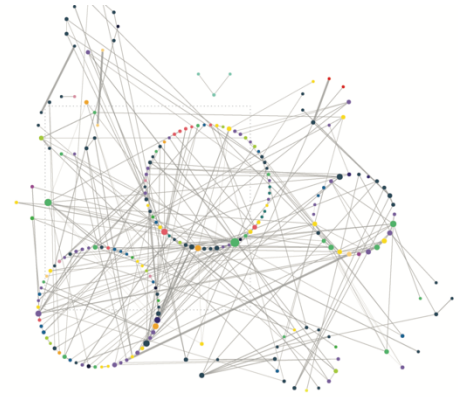

C

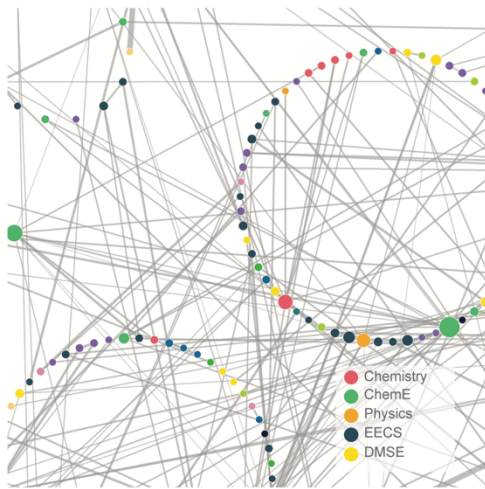

D

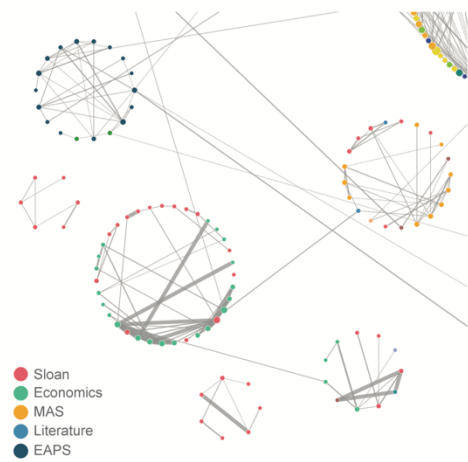

**Figure D. Communities in the A co-authorship and B co-invention networks.** C) The detailed views of the communities in the co-authorship network shows that seem to be more topically defined, in this case, Earth Atmospheric & Planetary Sciences, or Sloan and Economics. D) Communities in the co-invention network are more heterogeneous, comprising faculty from several different departments.

## 51 Section G - Bibliography

- 52 1. Catalini C. Microgeography and the Direction of Inventive Activity. SSRN Electron J. 2012;  
53 doi:10.2139/ssrn.2126890
- 54 2. Miron-Spektor E, Gino F, Argote L. Paradoxical frames and creative sparks: Enhancing individual  
55 creativity through conflict and integration. *Organ Behav Hum Decis Process*. 2011;116: 229–240.  
56 doi:10.1016/j.obhdp.2011.03.006
- 57 3. Peponis J, Bafna S, Bajaj R, Bromberg J, Congdon C, Rashid M, et al. Designing Space to Support  
58 Knowledge Work. *Environ Behav*. 2007;39: 815–840. doi:10.1177/0013916506297216
- 59 4. Porter ME. *The competitive advantage of nations: with a new introduction*. New York: Free Press;  
60 1998.
- 61 5. Porter M, Stern S. Innovation: Location Matters. *MIT Sloan Manag Rev*. 2001;42: 28–36.
- 62 6. Glaeser EL, Kerr WR, Ponzetto GAM. Clusters of entrepreneurship. *J Urban Econ*. 2010;67: 150–  
63 168. doi:10.1016/j.jue.2009.09.008
- 64 7. Delgado M, Porter M, Stern S. Clusters, Convergence, and Economic Performance [Internet].  
65 Cambridge, MA: National Bureau of Economic Research; 2012 Jul. Report No.: w18250. Available:  
66 <http://www.nber.org/papers/w18250.pdf>
- 67 8. Guzman J, Stern S. Where is Silicon Valley? *Science*. 2015;347: 606–609.  
68 doi:10.1126/science.aaa0201
- 69 9. Bettencourt LMA, Lobo J, Helbing D, Kuhnert C, West GB. Growth, innovation, scaling, and the  
70 pace of life in cities. *Proc Natl Acad Sci*. 2007;104: 7301–7306. doi:10.1073/pnas.0610172104
- 71 10. Bettencourt LMA, Lobo J, Strumsky D, West GB. Urban Scaling and Its Deviations: Revealing the  
72 Structure of Wealth, Innovation and Crime across Cities. Añel JA, editor. *PLoS ONE*. 2010;5:  
73 e13541. doi:10.1371/journal.pone.0013541
- 74 11. Rothwell J, Lobo J, Strumsky D, Muro M. *Patenting Prosperity: Invention and Economic*  
75 *Performance in the United States and its Metropolitan Areas*. Brookings Institute; 2013 Feb.
- 76 12. Tijssen RJW, Waltman L, van Eck NJ. Collaborations span 1,553 kilometres. *Nature*. 2011;473:  
77 154–154. doi:10.1038/473154a
- 78 13. Newman MEJ. The structure of scientific collaboration networks. *Proc Natl Acad Sci*. 2001;98: 404–  
79 409. doi:10.1073/pnas.98.2.404
- 80 14. Borner K, Maru JT, Goldstone RL. The simultaneous evolution of author and paper networks. *Proc*  
81 *Natl Acad Sci*. 2004;101: 5266–5273. doi:10.1073/pnas.0307625100
- 82 15. Bornmann L, Mutz R. Growth rates of modern science: A bibliometric analysis based on the number  
83 of publications and cited references. *J Assoc Inf Sci Technol*. 2014;
- 84 16. Rosenberg N, Nelson RR. American universities and technical advance in industry. *Res Policy*.  
85 1994;23: 323–348. doi:10.1016/0048-7333(94)90042-6

- 86 17. Link AN, Scott JT, Siegel DS. The economics of intellectual property at universities: an overview of  
87 the special issue. *Int J Ind Organ*. 2003;21: 1217–1225. doi:10.1016/S0167-7187(03)00080-8
- 88 18. Jensen R, Thursby J, Thursby M. The Disclosure and Licensing of University Inventions [Internet].  
89 Cambridge, MA: National Bureau of Economic Research; 2003 May. Report No.: w9734. Available:  
90 <http://www.nber.org/papers/w9734.pdf>
- 91 19. Murray F, Stern S. Do formal intellectual property rights hinder the free flow of scientific  
92 knowledge? *J Econ Behav Organ*. 2007;63: 648–687. doi:10.1016/j.jebo.2006.05.017

93
